# Supplementary material
Source: publisher figshare collection journal article supplement (https://acs.figshare.com/ndownloader/files/17018756)
Supplement: Supplementary file 1 [file 17018756]

## **Supporting Information**

### **In-situ Imaging of Azoreductase Activity in the Acute and Chronic Ulcerative Colitis Mice by a Near-infrared Fluorescent Probe**

Yang Tian,<sup>†</sup> Yongfei Li,<sup>†,‡</sup> Wen-Li Jiang,<sup>†</sup> Dong-Ye Zhou,<sup>†</sup> Junjie Fei,<sup>†</sup> and Chun-Yan Li<sup>\*,†</sup>

<sup>†</sup>Key Laboratory of Environmentally Friendly Chemistry and Applications of Ministry of Education,  
College of Chemistry, Xiangtan University, Xiangtan, 411105, People's Republic of China

<sup>‡</sup>College of Chemical Engineering, Xiangtan University, Xiangtan, 411105, People's Republic of  
China

\*Corresponding Author. E-mail: lichunyan79@sina.com.

## Table of contents

|                                                           |      |
|-----------------------------------------------------------|------|
| 1. Synthesis of Cy-Azo.....                               | S-3  |
| 2. Characterization of Cy-NH <sub>2</sub> and Cy-Azo..... | S-7  |
| 3. Spectroscopic response of Cy-Azo to AzoR .....         | S-10 |
| 4. Enzyme kinetics .....                                  | S-12 |
| 5. Selectivity.....                                       | S-13 |
| 6. AzoR inhibitor investigation .....                     | S-14 |
| 7. Effect of inhibitor on Cy-NH <sub>2</sub> .....        | S-15 |
| 8. Mechanism investigation.....                           | S-16 |
| 9. Cell viability.....                                    | S-18 |
| 10. Fluorescence imaging in living cells.....             | S-19 |
| 11. Fluorescence imaging in bacteria.....                 | S-20 |
| 12. Fluorescence imaging in UC mice .....                 | S-21 |

## 1. Synthesis of Cy-Azo

**Scheme S1** Synthetic route for Cy-Azo

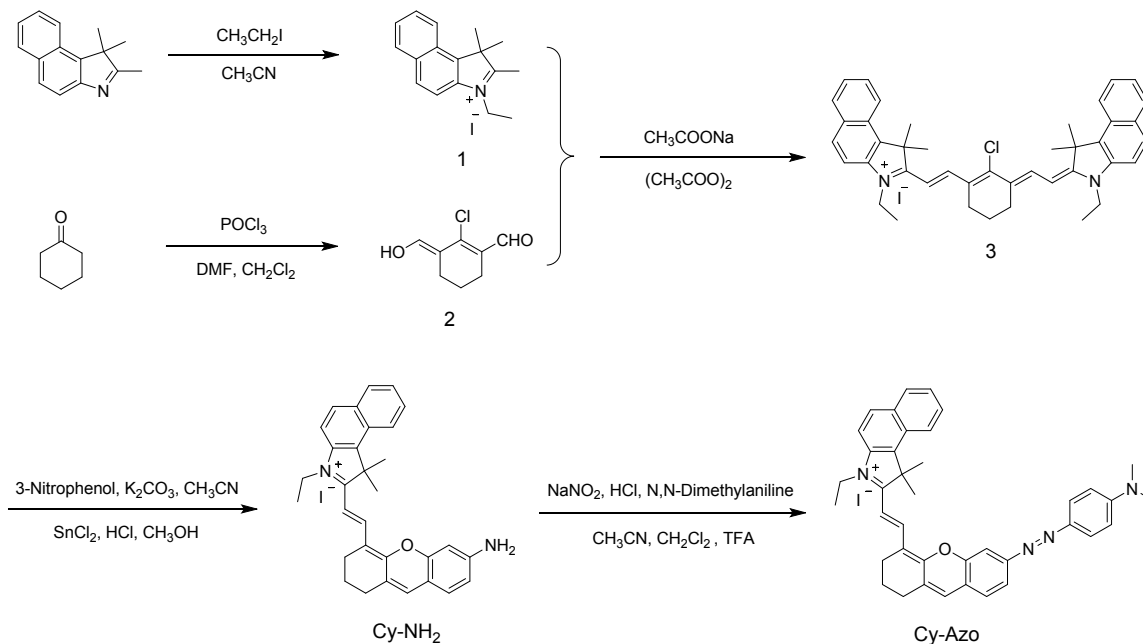

**Compound 1.** 1,1,2-Trimethylbenzoindolenine (1.05 g, 5.0 mmol) and iodoethane (1.17 g, 7.5 mmol) were dissolved in acetonitrile (20.0 mL). The reaction mixture was stirred and refluxed for 15 h. After cooling, the mixture was filtered and washed with ether to obtain a white solid product. Yield: 1.46 g (80%).  $^1\text{H}$  NMR (400 MHz,  $\text{CDCl}_3$ )  $\delta$  8.12 (d,  $J$  = 8.8 Hz, 1H), 8.08 (d,  $J$  = 8.8 Hz, 1H), 8.06 (d,  $J$  = 8.4 Hz, 1H), 7.81 (d,  $J$  = 8.8 Hz, 1H), 7.73 (m, 1H), 7.66 (m, 1H), 4.88 (q,  $J$  = 7.2 Hz, 14.8 Hz, 2H), 3.22 (s, 3H), 1.86 (s, 6H), 1.66 (t,  $J$  = 7.2 Hz, 3H). MS (TOF): 238.2.

**Compound 2.** A solution of 4.0 mL of dimethylformamide and 4.0 mL of methylene chloride was chilled in an ice bath. Phosphorus oxychloride (2.46 g, 16.0 mmol) dissolved in 3.0 mL of methylene chloride was then added dropwise with stirring, followed by the addition of cyclohexanone (0.39 g, 4.0 mmol). The reaction mixture was stirred and refluxed for 3 h. After cooling, the mixture was poured into 40.0 g ice and allowed to stand overnight. And then, the mixture was filtered to obtain

a yellow solid product. Yield: 0.45 g (65%).  $^1\text{H}$  NMR (400 MHz,  $\text{CDCl}_3$ )  $\delta$  10.24 (s, 1H), 2.63 (s, 1H), 2.47 (t,  $J$  = 8.0 Hz, 4H), 1.71-1.68 (m, 2H). MS (TOF): 172.1.

**Compound 3.** Compound 1 (1.10 g, 3.0 mmol), freshly prepared compound 2 (0.26 g, 1.5 mmol), sodium acetate (0.25 g, 3.0 mmol) were dissolved in acetic anhydride (20.0 mL). The reaction mixture was heated to 70°C for 0.5 h. After the removal of solvent under reduced pressure, the crude product was washed with sodium bicarbonate saturated solution to obtain a brick red solid product. Yield: 0.83 g (75%).  $^1\text{H}$  NMR (400 MHz,  $\text{CDCl}_3$ )  $\delta$  8.46 (d,  $J$  = 14.0 Hz, 2H), 8.13 (d,  $J$  = 8.4 Hz, 2H), 8.11-7.93 (m, 4H), 7.61 (m, 2H), 7.47-7.25 (m, 4H), 6.29 (d,  $J$  = 14.0 Hz, 2H), 4.39 (q,  $J$  = 7.0 Hz, 14.2 Hz, 4H), 2.79 (t,  $J$  = 6.0 Hz, 4H), 2.01 (s, 12H), 1.62 (s, 2H) 1.53 (t,  $J$  = 6.8 Hz, 6H). MS (TOF): 611.3.

**Compound Cy-NH<sub>2</sub>.** 3-Nitrophenol (0.35 g, 2.5 mmol) and  $\text{K}_2\text{CO}_3$  (0.35 g, 2.5 mmol) were dissolved in 15.0 mL  $\text{CH}_3\text{CN}$  in a flask, and the mixture was stirred at room temperature under nitrogen atmosphere for 10 min. Then, compound 3 (0.74 g, 1.0 mmol) in  $\text{CH}_3\text{CN}$  (2.0 mL) was introduced to the mixture via a syringe and the reaction mixture was stirred at room temperature for 4 h. The solvent was then evaporated under reduced pressure and the precipitate was dissolved in  $\text{CH}_2\text{Cl}_2$ , followed by washing with water for three times and drying over  $\text{Na}_2\text{SO}_4$ . The residue obtained by evaporation was dispersed in 30.0 mL  $\text{CH}_3\text{OH}$  for further use in the next step.

$\text{SnCl}_2$  (3.8 g, 20.0 mmol) dissolved in concentrated HCl (4.0 mL) was added the above solution under nitrogen atmosphere. The reaction solution was heated to 70°C and stirred overnight. Then, the solution was neutralized by saturated  $\text{Na}_2\text{CO}_3$ , and the precipitate was removed by filtration and washed with  $\text{CH}_2\text{Cl}_2$ . The collected filtrate and washings were treated thrice with water and dried over

Na<sub>2</sub>SO<sub>4</sub>. The solvent was removed by evaporation under reduced pressure, and the residue was subjected to silica gel chromatography with CH<sub>2</sub>Cl<sub>2</sub>/CH<sub>3</sub>OH (50/3, v/v) as eluent to afford a dark blue solid product. Yield: 0.33 g (58%). <sup>1</sup>H NMR (400 MHz, DMSO): δ 8.54 (d, J = 14.4 Hz, 1H), 8.22 (d, J = 8.0 Hz, 1H), 8.12-8.06 (m, 2H), 7.80 (d, J = 8.8 Hz, 1H), 7.67 (t, J = 7.2 Hz, 1H), 7.61 (s, 1H), 7.53 (t, J = 15.2 Hz, 1H), 7.39 (d, J = 8.4 Hz, 1H), 6.72-6.69 (m, 2H), 6.30 (d, J = 14.8 Hz, 1H), 4.38 (q, J = 6.4 Hz, 7.2 Hz, 2H), 2.71-2.66 (m, 4H), 1.95 (s, 6H), 1.83 (m, 2H), 1.36 (t, J = 7.2 Hz, 3H). <sup>13</sup>C NMR (100 MHz, DMSO): δ 175.1, 162.6, 156.1, 155.4, 141.6, 139.7, 138.4, 134.1, 132.1, 131.1, 130.5, 130.2, 128.4, 127.9, 125.6, 123.0, 122.5, 114.9, 114.3, 113.2, 112.2, 100.1, 97.9, 51.4, 46.3, 28.4, 27.8, 24.2, 20.7, 12.9. MS (TOF): 447.3.

**Compound Cy-Azo.** Cy-NH<sub>2</sub> (0.11 g, 0.2 mmol) was dissolved in CH<sub>3</sub>CN/CH<sub>2</sub>Cl<sub>2</sub> (1:1, 10.0 mL) containing 1% trifluoroacetic acid (TFA) and the mixture was stirred at 0°C under nitrogen atmosphere. Then, NaNO<sub>2</sub> (0.03 g, 0.4 mmol) was added, and stirring was continued at the same temperature for 30 min. Next, sulfamic acid (0.04 g, 0.4 mmol) was added and stirring for 10 min. Immediately, N,N-dimethylaniline (0.3 mL, 2.4 mmol) in CH<sub>3</sub>CN (2.0 mL) was added and further stirred at 0°C for 1.5 h. The mixture was diluted with H<sub>2</sub>O and extracted with CH<sub>2</sub>Cl<sub>2</sub>. The organic layer was collected, washed with brine, dried over anhydrous Na<sub>2</sub>SO<sub>4</sub> and evaporated to dryness. The residue was subjected to silica gel chromatography with CH<sub>2</sub>Cl<sub>2</sub>/CH<sub>3</sub>OH (20/1, v/v) as eluent to afford a deep green solid product. Yield: 0.07 g (50%). <sup>1</sup>H NMR (400 MHz, DMSO): δ 8.73 (d, J = 15.2 Hz, 1H), 8.43 (d, J = 8.8 Hz, 1H), 8.21 (d, J = 8.8 Hz, 1H), 8.15 (d, J = 8.0 Hz, 1H), 7.98 (d, J = 9.2 Hz, 1H), 7.85 (d, J = 9.2 Hz, 2H), 7.77-7.70 (m, 3H), 7.65-7.63 (m, 2H), 7.44 (s, 1H), 6.86 (d, J = 9.2 Hz, 2H), 6.70 (d, J = 15.2 Hz, 1H), 4.60 (d, J = 7.2 Hz, 2H), 3.09 (s, 3H), 2.73 (t, J = 7.6 Hz, 3H), 1.85 (s,

2H), 1.43 (t, J = 6.8 Hz, 4H), 1.20 (s, 6H), 0.82 (t, J = 4.4 Hz, 3H).  $^{13}\text{C}$  NMR (100 MHz, DMSO):  $\delta$  179.4, 159.2, 154.5, 153.6, 153.4, 144.8, 143.2, 139.0, 137.1, 133.0, 131.4, 131.3, 131.1, 130.5, 128.7, 128.6, 127.5, 126.9, 126.0, 123.3, 123.1, 119.5, 115.1, 113.0, 112.1, 108.9, 105.9, 52.9, 41.4, 29.5, 27.3, 24.1, 22.6, 20.3, 13.6. MS (TOF): 579.4. Elem. anal. (%) calcd. for  $\text{C}_{39}\text{H}_{39}\text{IN}_4\text{O}$ : C, 66.29, H, 5.56, N, 7.93. Found: C, 66.20, H, 5.57, N, 7.96.

## 2. Characterization of Cy-NH<sub>2</sub> and Cy-Azo

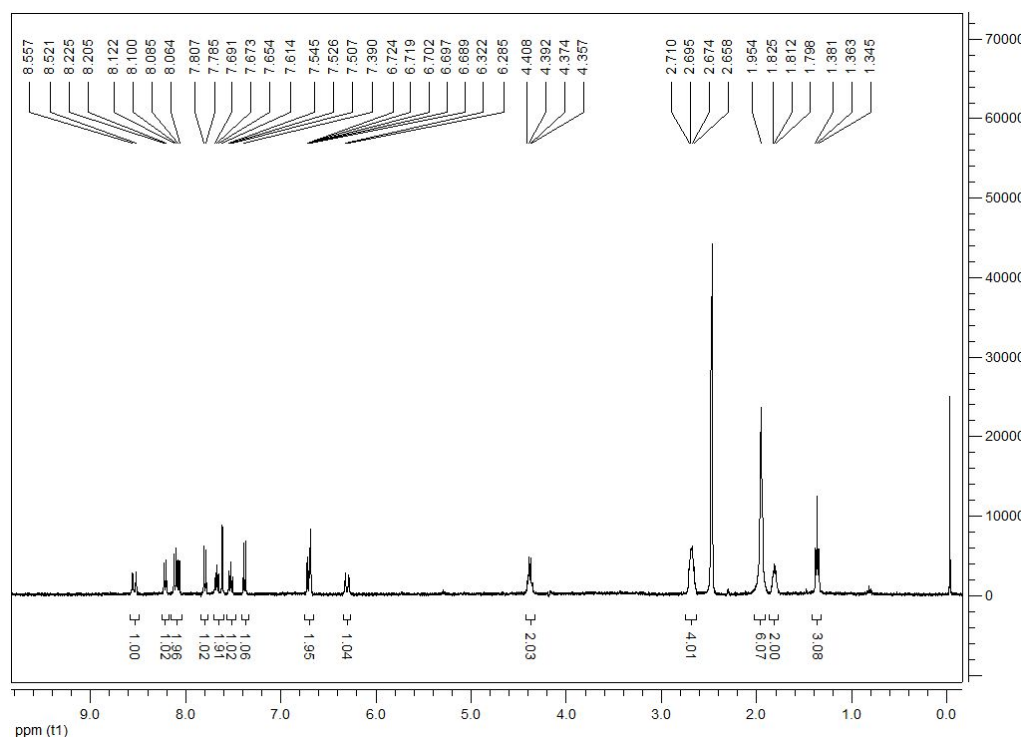

Figure S1. <sup>1</sup>H NMR spectra of Cy-NH<sub>2</sub> in DMSO.

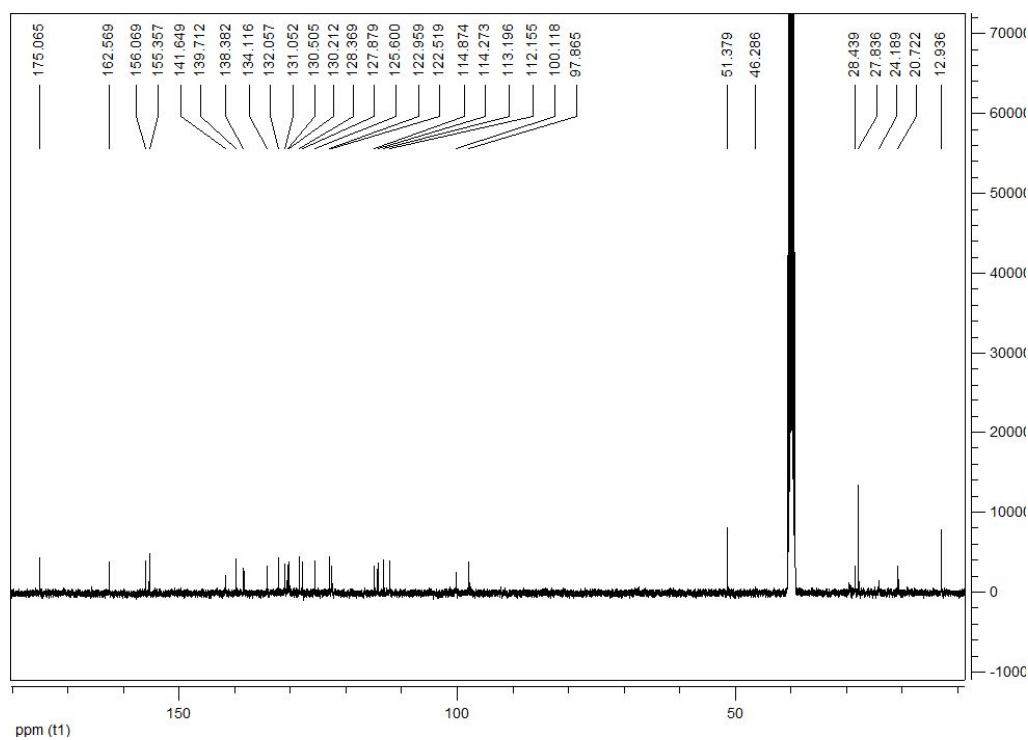

Figure S2. <sup>13</sup>C NMR spectra of Cy-NH<sub>2</sub> in DMSO.





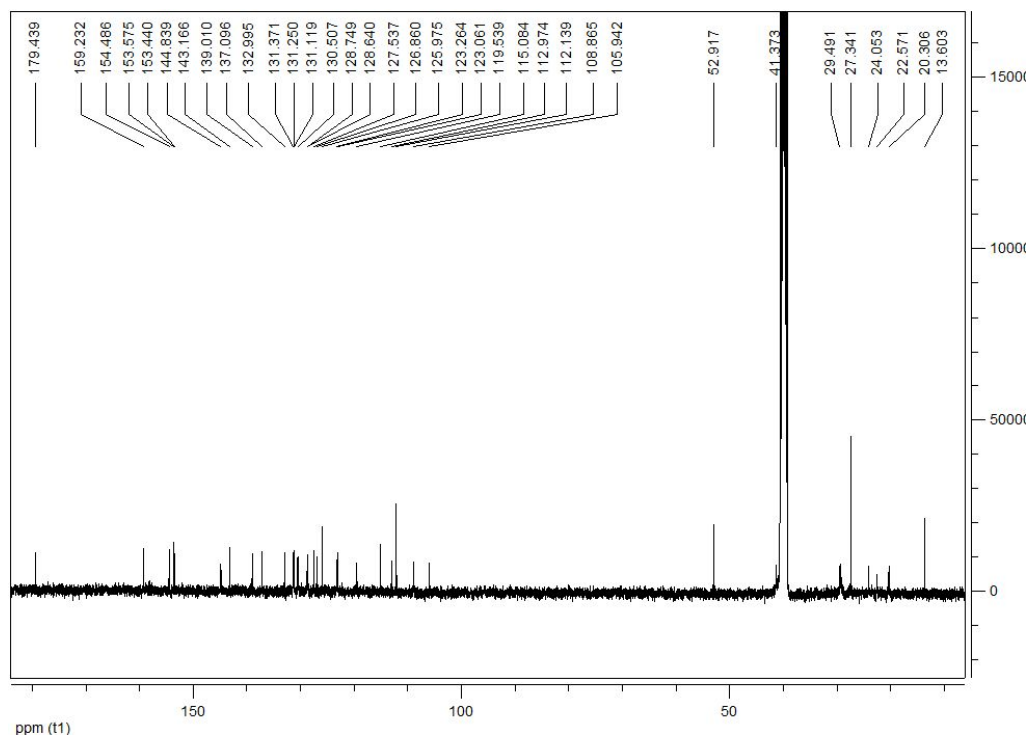

**Figure S5.**  $^{13}\text{C}$  NMR spectra of Cy-Azo in DMSO.

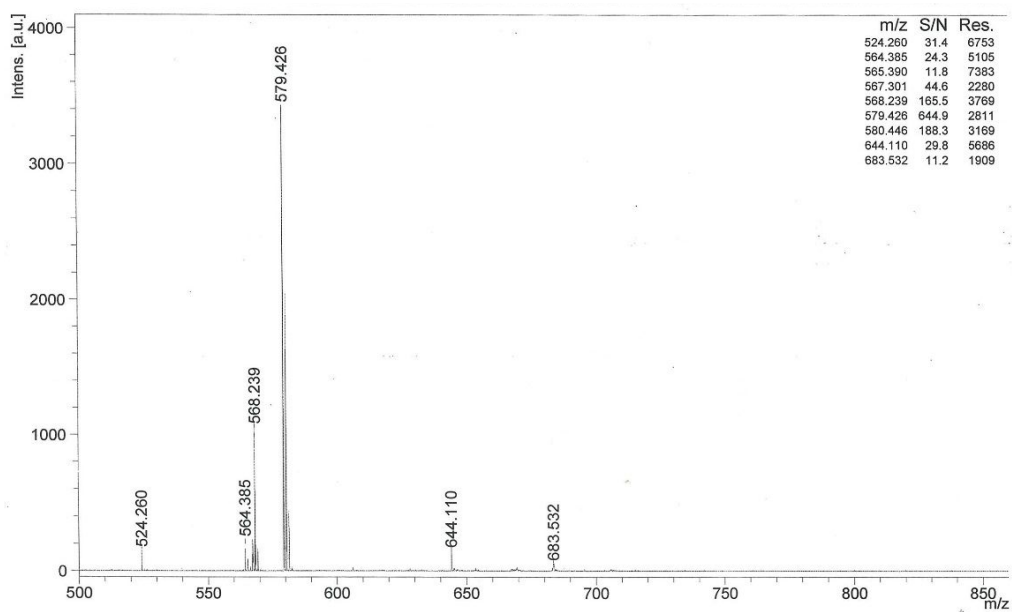

**Figure S6.** Mass spectra of Cy-Azo.

### 3. Spectroscopic response of Cy-Azo to AzoR

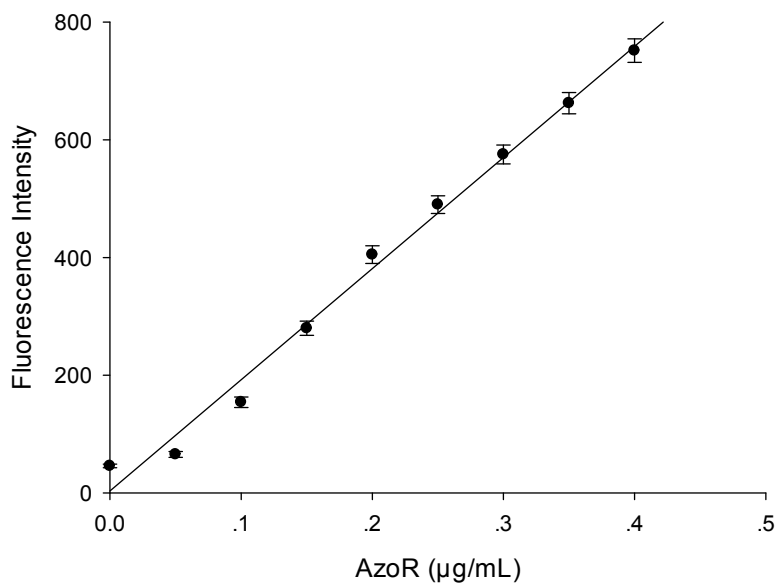

**Figure S7.** Linearity plots of the fluorescence intensity of Cy-Azo versus various enzyme activities.

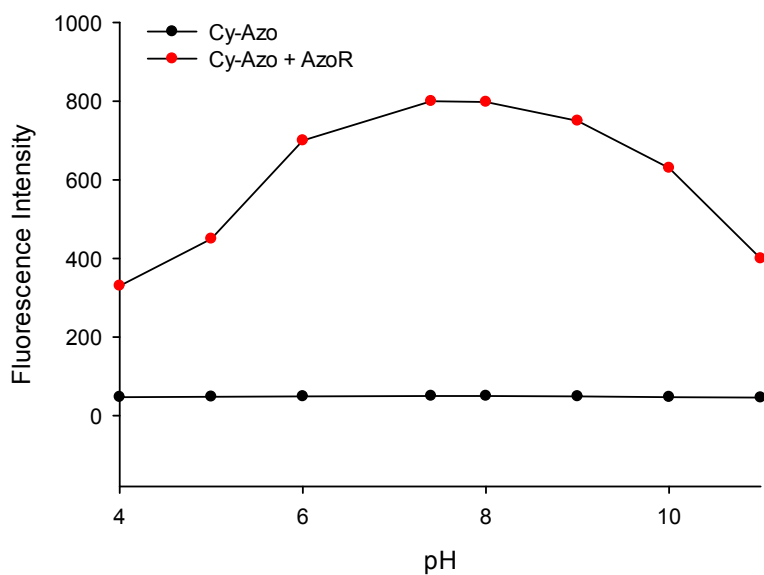

**Figure S8.** Effect of pH on the fluorescence intensity of Cy-Azo (10 μM) before and after the reaction with AzoR (0.4 μg/mL) with NADH (100 μM) in Tris-HCl buffer solution (pH 7.4, 50 mM, 1% DMSO).

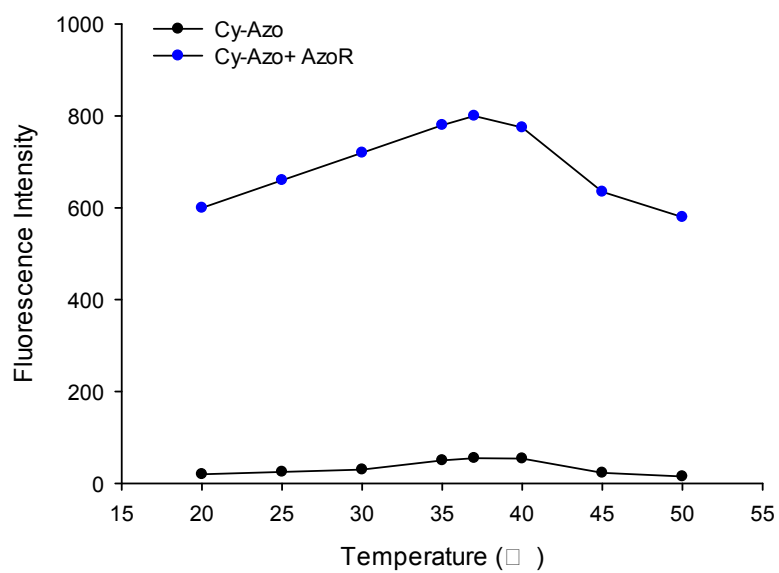

**Figure S9.** Effect of temperature on the fluorescence of Cy-Azo (10  $\mu$ M) before and after the reaction with AzoR (0.4  $\mu$ g/mL) with NADH (100  $\mu$ M) in Tris-HCl buffer solution (pH 7.4, 50 mM, 1% DMSO).

#### 4. Enzyme kinetics

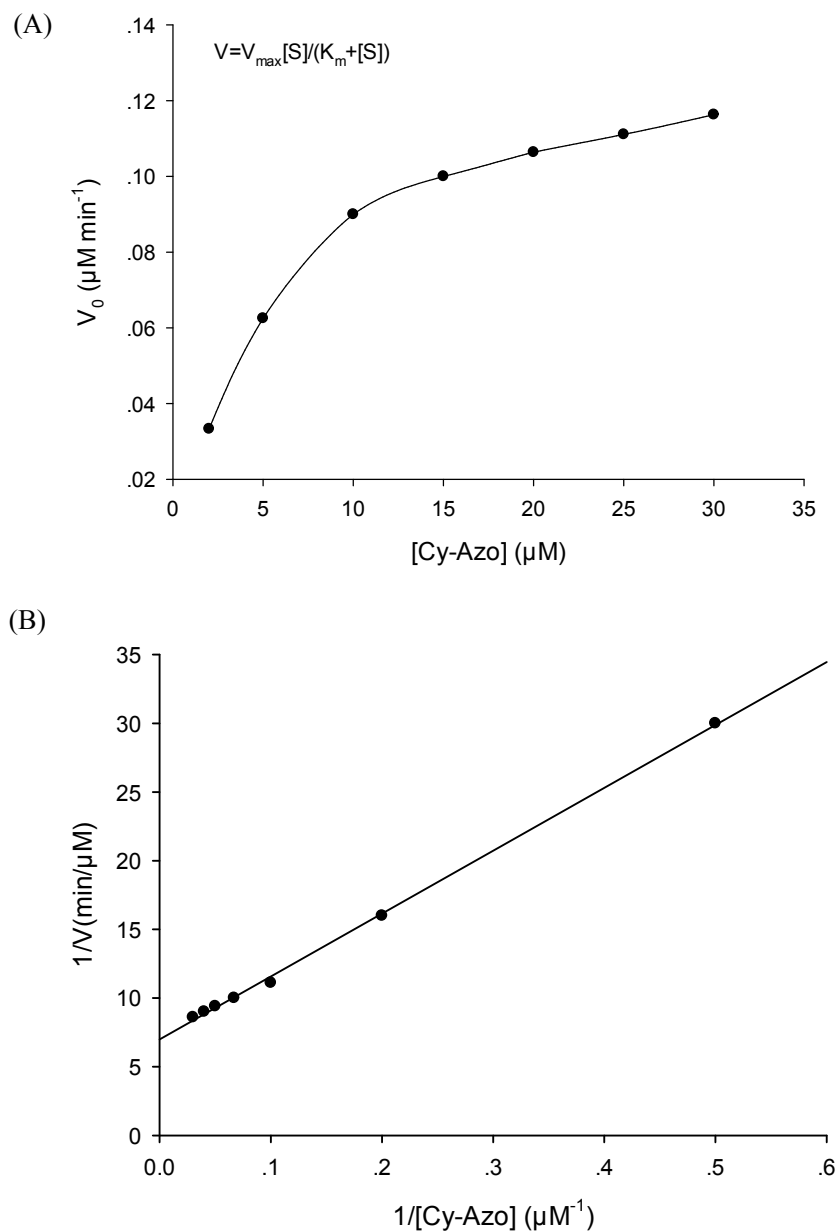

**Figure S10.** (A) Michaelis-Menten plot and (B) Lineweaver-Burke plot for the reaction between Cy-Azo and AzoR (0.4  $\mu\text{g/mL}$ ) with NADH (100  $\mu\text{M}$ ).

## 5. Selectivity

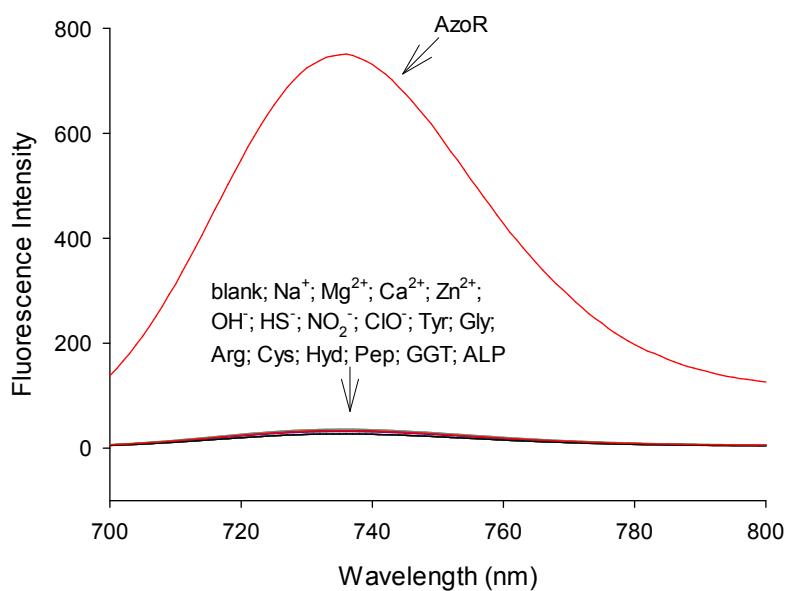

**Figure S11.** Fluorescence spectra of Cy-Azo (10  $\mu$ M) to AzoR (0.4  $\mu$ g/mL) with NADH (100  $\mu$ M) and other various species in Tris-HCl buffer solution (pH 7.4, 50 mM, 1% DMSO).

## 6. AzoR inhibitor investigation

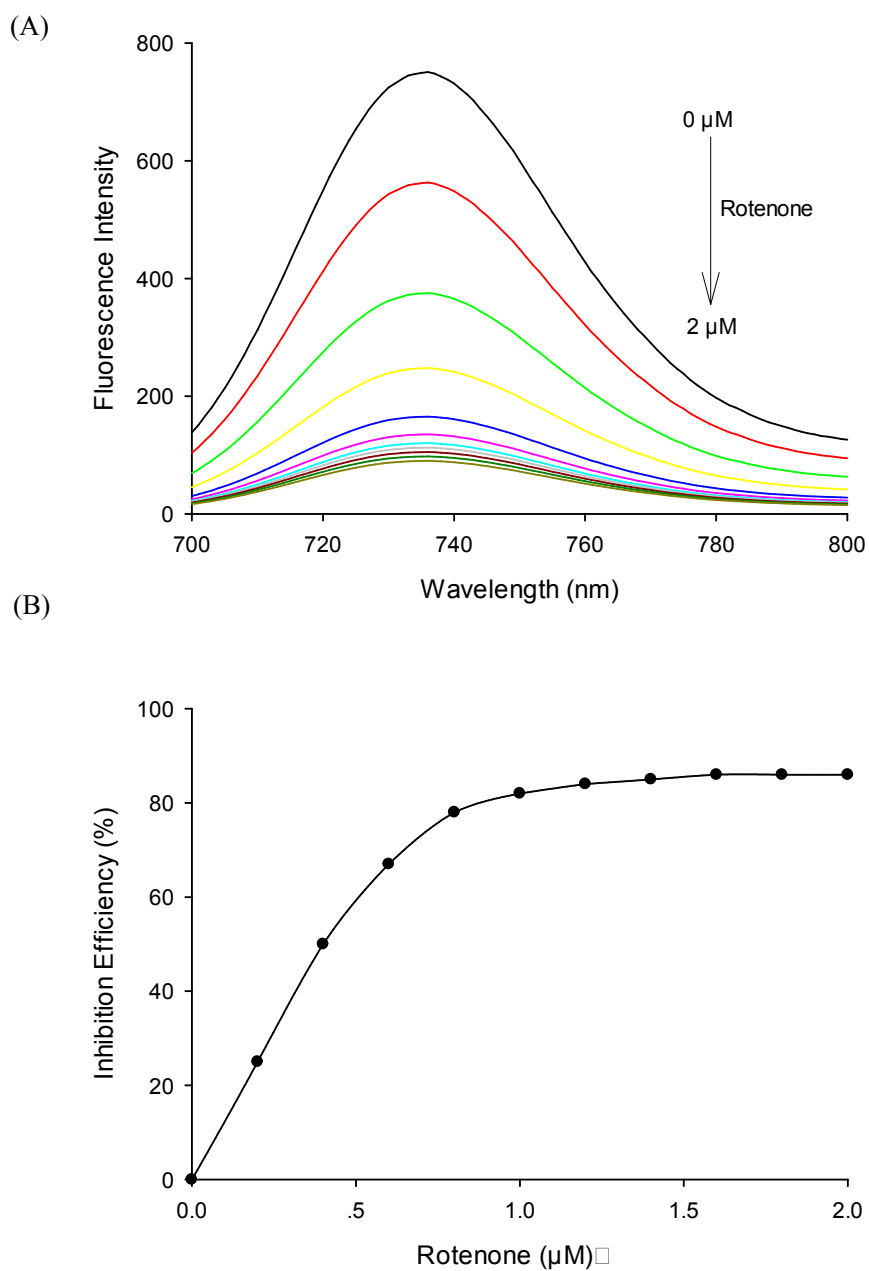

**Figure S12.** (A) Fluorescence spectra of Cy-Azo (10  $\mu\text{M}$ ) in the presence of AzoR (0.4  $\mu\text{g/mL}$ ) at different concentrations of rotenone (0-2  $\mu\text{M}$ ) in Tris-HCl buffer solution (pH 7.4, 50 mM, 1% DMSO). (B) The inhibition efficiency versus rotenone concentrations.

## 7. Effect of inhibitor on Cy-NH<sub>2</sub>

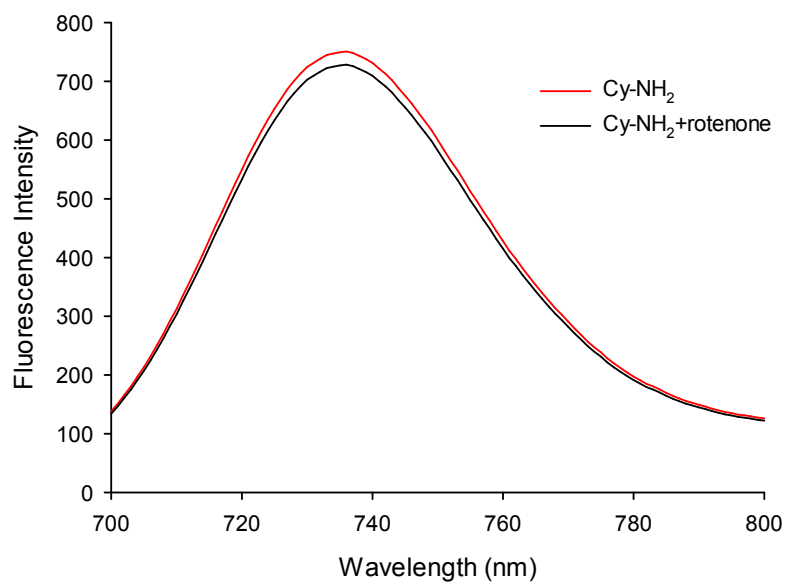

**Figure S13.** Fluorescence spectra of Cy-NH<sub>2</sub> (10  $\mu$ M) before and after the addition of rotenone (2  $\mu$ M) in Tris-HCl buffer solution (pH 7.4, 50 mM, 1% DMSO).

## 8. Mechanism investigation

**Scheme S2** Proposed response mechanism of probe Cy-Azo with AzoR.

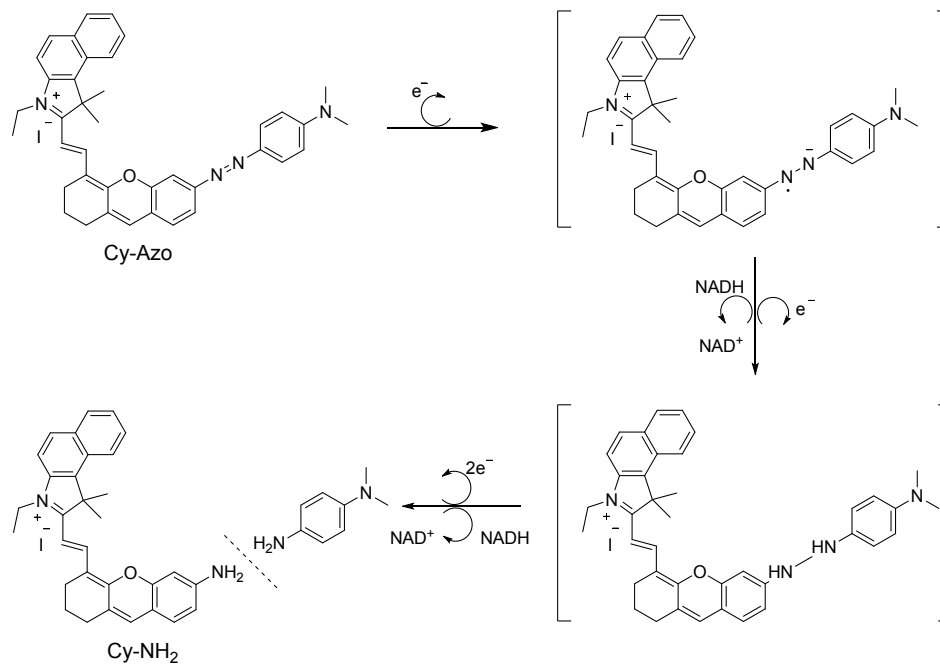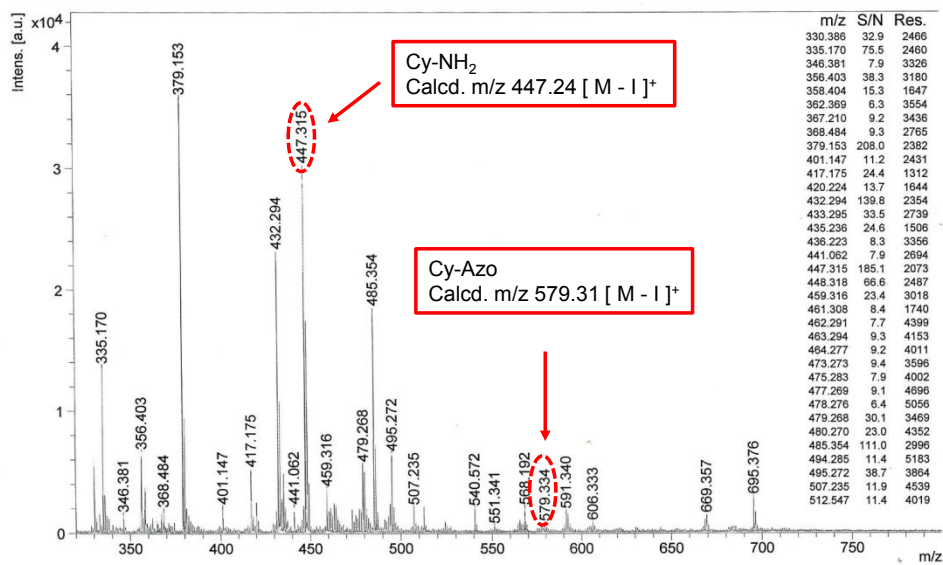

**Figure S14.** Mass spectra of Cy-Azo reacted with AzoR.



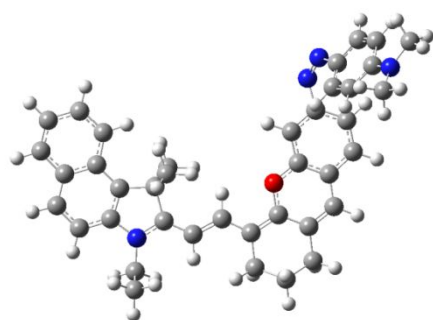

Cy-Azo

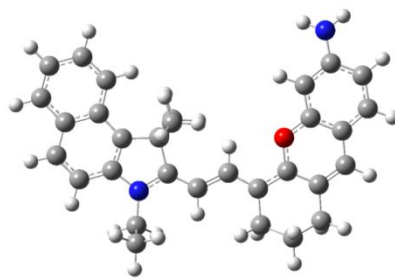

Cy-NH<sub>2</sub>

**Figure S15.** The optimized structures of Cy-Azo and Cy-NH<sub>2</sub>.

## 9. Cell viability

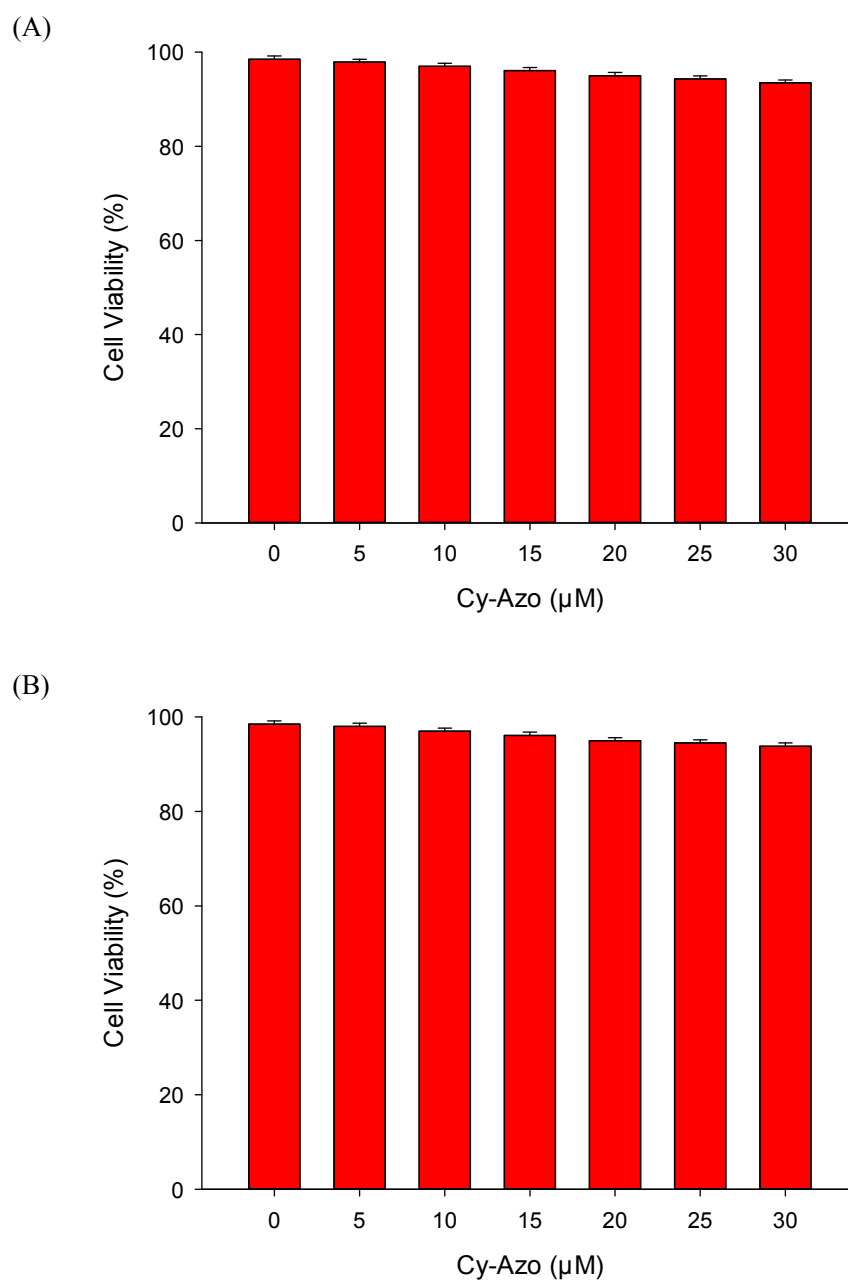

**Figure S16.** MTT assay for estimating cell viability (%) of (A) HCT116 cells and (B) HepG2 cells treated with various concentrations of Cy-Azo (0-30  $\mu\text{M}$ ) after 24 h incubation.

## 10. Fluorescence imaging in living cells

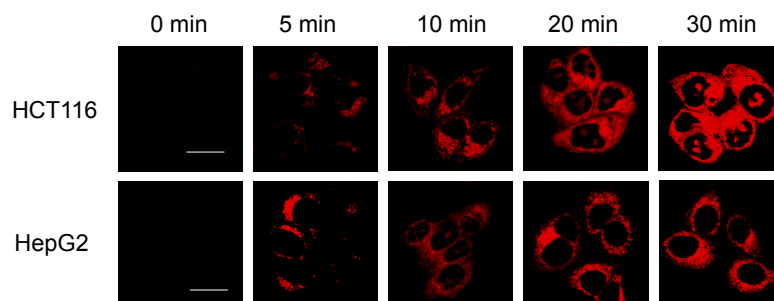

**Figure S17.** The time-dependent fluorescence response to AzoR activity in HCT116 cells and HepG2 cells. The cells were incubated with Cy-Azo (10  $\mu\text{M}$ ) at different time points: 0, 5, 10, 20 and 30 min.

$\lambda_{\text{ex}} = 640 \text{ nm}$ ,  $\lambda_{\text{em}} = 663\text{-}738 \text{ nm}$ ; Scale bar: 10  $\mu\text{m}$ .

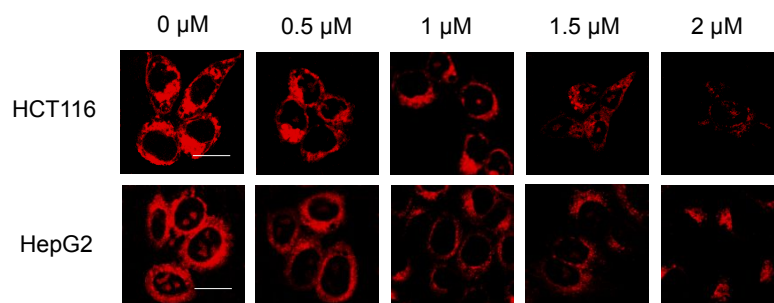

**Figure S18.** Fluorescence imaging of HCT116 cells and HepG2 cells incubated with different concentrations of AzoR inhibitor (rotenone, 0-2  $\mu\text{M}$ ) and Cy-Azo (10  $\mu\text{M}$ ).  $\lambda_{\text{ex}} = 640 \text{ nm}$ ,  $\lambda_{\text{em}} = 663\text{-}738 \text{ nm}$ ; Scale bar: 10  $\mu\text{m}$ .

## 11. Fluorescence imaging in bacteria

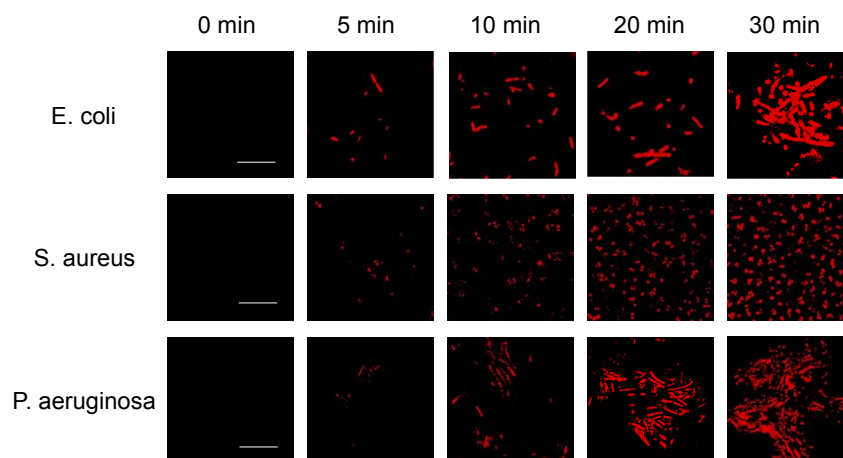

**Figure S19.** The time-dependent fluorescence response to AzoR activity in *E. coli*, *S. aureus* and *P. aeruginosa*. The bacteria were incubated with Cy-Azo (10  $\mu$ M) at different time points: 0, 5, 10, 20 and 30 min.  $\lambda_{\text{ex}} = 640$  nm,  $\lambda_{\text{em}} = 663\text{-}738$  nm; Scale bar: 10  $\mu$ m.

## 12. Fluorescence imaging in UC mice

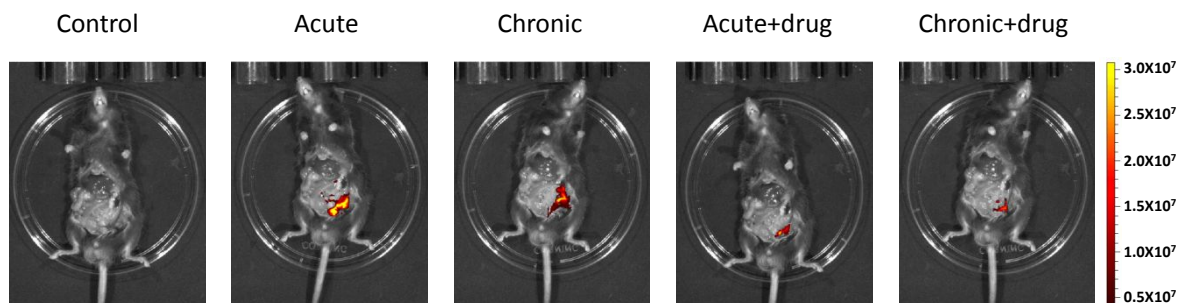

**Figure S20.** Fluorescence imaging of dissected mice from control group, acute UC group, chronic UC group, the therapy of acute UC group and the therapy of chronic UC group mice.  $\lambda_{\text{ex}} = 640 \text{ nm}$ ,  $\lambda_{\text{em}} = 695\text{-}770 \text{ nm}$ .

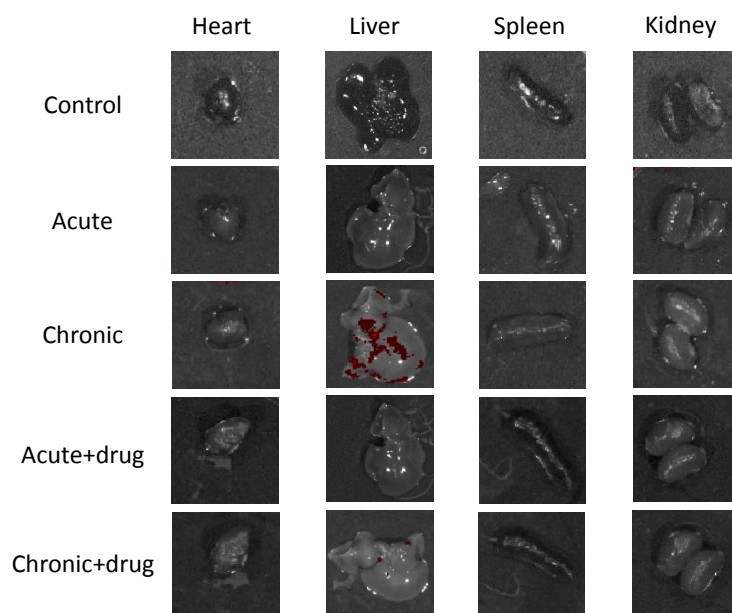

**Figure S21.** Fluorescence imaging of major organs (heart, liver, spleen, kidney) of mice from control group, acute UC group, chronic UC group, the therapy of acute UC group and the therapy of chronic UC group.  $\lambda_{\text{ex}} = 640 \text{ nm}$ ,  $\lambda_{\text{em}} = 695\text{-}770 \text{ nm}$ .
